# Supplementary material
Source: PubMed Central journal article supplement (PMC3222890)

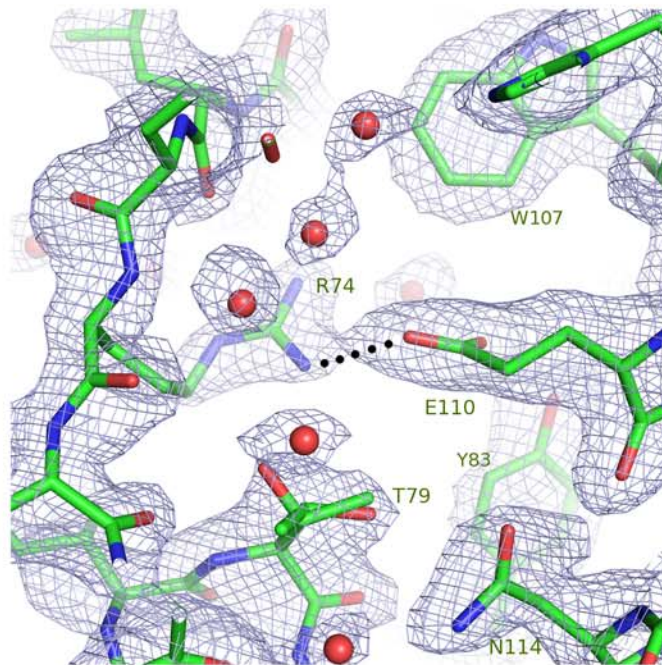

Supplementary Figure 1

Supplement: NIHMS333612-supplement-01.pdf [file NIHMS333612-supplement-01.pdf]
